# Supplementary material for: Data on the mRNA expression by in situ hybridization of Wnt signaling pathway members in the mouse uterus
Source: PubMed Central journal article supplement (PMC5393313; doi:10.1016/j.dib.2017.03.047), 2017-04-08
Supplement: mmc1.pdf [file mmc1.pdf]

We wish to confirm that there are no known conflicts of interest associated with this publication and there has been no significant financial support for this work that could have influenced its outcome.



Regards,  
Pradeep Tanwar  
ARC Future Fellow  
Cancer Institute NSW CD Fellow  
Senior Lecturer, University of Newcastle  
Callaghan 2308 NSW Australia  
02-49215148  
[pradeep.tanwar@newcastle.edu.au](mailto:pradeep.tanwar@newcastle.edu.au)
